# Supplementary material
Source: MDPI journal article supplement (https://www.mdpi.com/2073-445X/10/4/397)
Supplement: s1 [file s1]

### Supplement1: RPM and Century model inputs

Data sources from which model inputs were obtained are listed in Table 1. Because RPM was adapted from the Century model, the two models share many required inputs. RPM is a gridded or raster-based model and many of the required inputs are also raster-based. For Century simulations, which are point-based, input values were taken from the same data sources by taking the value from the pixel containing the simulation location.

Table 1. Input data sources and values for RPM and Century model runs.

| Input                                                                | Source                                                                                                                                                                   |
|----------------------------------------------------------------------|--------------------------------------------------------------------------------------------------------------------------------------------------------------------------|
| Soil variables                                                       | ISRIC SoilGrids 250m, version 2.0, available from <a href="http://soilgrids.org">soilgrids.org</a>                                                                       |
| Monthly average minimum/maximum daily temperature                    | Historical average annual monthly minimum and maximum temperature for the period 1970-2000, version 2.0, available from <a href="http://worldclim.org">worldclim.org</a> |
| Monthly precipitation                                                | Historical average annual monthly precipitation for the period 1970-2000, version 2.0, available from <a href="http://worldclim.org">worldclim.org</a>                   |
| Site parameters                                                      | See Table 2.                                                                                                                                                             |
| Plant functional type parameters                                     | See Table 2.                                                                                                                                                             |
| Animal parameters                                                    | See Table 2.                                                                                                                                                             |
| Management threshold                                                 | 100 kg/ha                                                                                                                                                                |
| Crude protein concentration of forage                                | 14.70%                                                                                                                                                                   |
| Grazing animal density (fifteen sites across precipitation gradient) | Empirical dung counts (see main text for methodology)                                                                                                                    |
| Grazing animal density (Gobi-Steppe ecoregion simulation)            | Total number of livestock in each soum in 2018, available from <a href="http://1212.mn">1212.mn</a> . Converted to Sheep Forage Units following [1]                      |

Table 2. Animal, site, and plant functional type parameters. Birth weight, standard reference weight, and standard fleece weight from [2]. Impacts of grazing on vegetation growth from the “grazing-tolerant” population described by [3]. Parameters for temperate C3 grassland in Tuva, Russia, described by [4] were calibrated via comparison to biomass data collected in Mongolia. See “Calibration of RPM and Century” for calibration methods. See RPM documentation, Appendix 1, for parameter definitions.

| Type                  | Parameter    | Value         |
|-----------------------|--------------|---------------|
| animal                | sex          | nonlac_female |
| animal                | age          | 116           |
| animal                | weight       | 18.6          |
| animal                | SRW          | 32.4          |
| animal                | SFW          | 2.28          |
| animal                | birth_weight | 2.4           |
| animal                | gfcret       | 0.3           |
| animal                | gret_2       | 0.95          |
| animal                | fecf_1       | 0.5           |
| animal                | fecf_2       | 0.9           |
| animal                | feclig       | 0.25          |
| plant functional type | grzeff       | 2             |
| plant functional type | biok5        | 60            |
| plant functional type | biomax       | 400           |
| plant functional type | cfrtcn_1     | 0.4           |
| plant functional type | cfrtcn_2     | 0.25          |
| plant functional type | cfrtcw_1     | 0.5           |
| plant functional type | cfrtcw_2     | 0.1           |
| plant functional type | claypg       | 4             |
| plant functional type | crprt_1      | 0             |
| plant functional type | crprt_2      | 0             |
| plant functional type | fallrt       | 0.2           |
| plant functional type | fligni_1_1   | 0.2           |
| plant functional type | fligni_1_2   | 0.26          |

|                       |            |         |
|-----------------------|------------|---------|
| plant functional type | fligni_2_1 | 0.00012 |
| plant functional type | fligni_2_2 | -0.0015 |
| plant functional type | frtcindx   | 1       |
| plant functional type | fsdeth_1   | 0.2     |
| plant functional type | fsdeth_2   | 0.95    |
| plant functional type | fsdeth_3   | 0.2     |
| plant functional type | fsdeth_4   | 150     |
| plant functional type | nlaypg     | 4       |
| plant functional type | ppdf_1     | 15      |
| plant functional type | ppdf_2     | 35      |
| plant functional type | ppdf_3     | 1       |
| plant functional type | ppdf_4     | 2.5     |
| plant functional type | pramn_1_1  | 20      |
| plant functional type | pramn_1_2  | 90      |
| plant functional type | pramn_2_1  | 390     |
| plant functional type | pramn_2_2  | 390     |
| plant functional type | pramx_1_1  | 35      |
| plant functional type | pramx_1_2  | 95      |
| plant functional type | pramx_2_1  | 440     |
| plant functional type | pramx_2_2  | 440     |
| plant functional type | prbm_n_1_1 | 50      |
| plant functional type | prbm_n_1_2 | 0       |
| plant functional type | prbm_n_2_1 | 390     |
| plant functional type | prbm_n_2_2 | 0       |
| plant functional type | prbm_x_1_1 | 55      |
| plant functional type | prbm_x_1_2 | 0       |
| plant functional type | prbm_x_2_1 | 420     |
| plant functional type | prbm_x_2_2 | 0       |
| plant functional type | prdx_1     | 0.2     |
| plant functional type | rdr        | 0.05    |

|                       |                         |                 |
|-----------------------|-------------------------|-----------------|
| plant functional type | rtdtmp                  | 2               |
| plant functional type | snfxmx_1                | 0               |
| plant functional type | vlossp                  | 0.15            |
| plant functional type | gremb                   | 0               |
| plant functional type | growth_months           | 1,2,3,4,5,6,7,8 |
| plant functional type | senescence_month        | 9               |
| plant functional type | species_factor          | 0               |
| plant functional type | digestibility_slope     | 1.5349          |
| plant functional type | digestibility_intercept | 0.4147          |
| site                  | cmix                    | 0.5             |
| site                  | adep_1                  | 15              |
| site                  | adep_10                 | 0               |
| site                  | adep_2                  | 15              |
| site                  | adep_3                  | 15              |
| site                  | adep_4                  | 15              |
| site                  | adep_5                  | 30              |
| site                  | adep_6                  | 30              |
| site                  | adep_7                  | 30              |
| site                  | adep_8                  | 30              |
| site                  | adep_9                  | 0               |
| site                  | agppa                   | -40             |
| site                  | agppb                   | 7.7             |
| site                  | aneref_1                | 1.5             |
| site                  | aneref_2                | 3               |
| site                  | aneref_3                | 0.3             |
| site                  | animpt                  | 5               |
| site                  | awtl_1                  | 0.8             |
| site                  | awtl_10                 | 0               |
| site                  | awtl_2                  | 0.6             |
| site                  | awtl_3                  | 0.4             |

|      |          |        |
|------|----------|--------|
| site | awtl_4   | 0.3    |
| site | awtl_5   | 0.2    |
| site | awtl_6   | 0.2    |
| site | awtl_7   | 0.2    |
| site | awtl_8   | 0.2    |
| site | awtl_9   | 0      |
| site | bgppa    | 100    |
| site | bgppb    | 7      |
| site | damr_1_1 | 0      |
| site | damr_1_2 | 0      |
| site | damr_2_1 | 0.02   |
| site | damr_2_2 | 0.02   |
| site | damrmn_1 | 15     |
| site | damrmn_2 | 150    |
| site | dec1_1   | 3.9    |
| site | dec1_2   | 4.9    |
| site | dec2_1   | 14.8   |
| site | dec2_2   | 18.5   |
| site | dec3_1   | 6      |
| site | dec3_2   | 7.3    |
| site | 4-Dec    | 0.0045 |
| site | dec5_1   | 0.2    |
| site | dec5_2   | 0.2    |
| site | deck5    | 5      |
| site | drain    | 1      |
| site | edepth   | 0.2    |
| site | elitst   | 0.4    |
| site | epnfa_1  | 0.0001 |
| site | epnfa_2  | 0.008  |
| site | epnfs_1  | 30     |

|      |             |      |
|------|-------------|------|
| site | epnfs_2     | 0.01 |
| site | favail_1    | 0.9  |
| site | favail_4    | 0.2  |
| site | favail_5    | 0.4  |
| site | favail_6    | 2    |
| site | fleach_1    | 0.2  |
| site | fleach_2    | 0.7  |
| site | fleach_3    | 1    |
| site | fleach_4    | 0    |
| site | fracro      | 0.15 |
| site | fwloss_1    | 0.8  |
| site | fwloss_2    | 0.8  |
| site | fwloss_3    | 0.65 |
| site | fwloss_4    | 0.8  |
| site | minlch      | 18   |
| site | nlayer      | 6    |
| site | omlech_1    | 0.03 |
| site | omlech_2    | 0.12 |
| site | omlech_3    | 60   |
| site | p1co2a_1    | 0.6  |
| site | p1co2a_2    | 0.17 |
| site | p1co2b_1    | 0    |
| site | p1co2b_2    | 0.68 |
| site | p2co2_1     | 0.55 |
| site | p2co2_2     | 0.55 |
| site | p3co2       | 0.55 |
| site | pabres      | 100  |
| site | pcemic1_1_1 | 16   |
| site | pcemic1_1_2 | 200  |
| site | pcemic1_2_1 | 10   |

|      |             |         |
|------|-------------|---------|
| site | pcemic1_2_2 | 99      |
| site | pcemic1_3_1 | 0.02    |
| site | pcemic1_3_2 | 0.0015  |
| site | pcemic2_1_1 | 20      |
| site | pcemic2_1_2 | 250     |
| site | pcemic2_2_1 | 10      |
| site | pcemic2_2_2 | 99      |
| site | pcemic2_3_1 | 0.02    |
| site | pcemic2_3_2 | 0.0015  |
| site | peftxa      | 0.25    |
| site | peftxb      | 0.75    |
| site | pligst_1    | 3       |
| site | pligst_2    | 3       |
| site | pmco2_1     | 0.55    |
| site | pmco2_2     | 0.55    |
| site | pmnsec_1    | 0       |
| site | pmnsec_2    | 0       |
| site | pmntmp      | 0.004   |
| site | pmxbio      | 600     |
| site | pmxtmp      | -0.0035 |
| site | pparmn_1    | 0       |
| site | pparmn_2    | 0.0001  |
| site | pprpts_1    | 0       |
| site | pprpts_2    | 1       |
| site | pprpts_3    | 0.8     |
| site | precro      | 8       |
| site | ps1co2_1    | 0.45    |
| site | ps1co2_2    | 0.55    |
| site | ps1s3_1     | 0.003   |
| site | ps1s3_2     | 0.032   |

|      |            |        |
|------|------------|--------|
| site | ps2s3_1    | 0.003  |
| site | ps2s3_2    | 0.009  |
| site | psecmn_1   | 0      |
| site | psecmn_2   | 0.0022 |
| site | psecoc1    | 0      |
| site | psecoc2    | 0      |
| site | pslsrb     | 1      |
| site | rad1p_1_1  | 12     |
| site | rad1p_1_2  | 220    |
| site | rad1p_2_1  | 3      |
| site | rad1p_2_2  | 5      |
| site | rad1p_3_1  | 5      |
| site | rad1p_3_2  | 100    |
| site | rcestr_1   | 200    |
| site | rcestr_2   | 500    |
| site | rictrl     | 0.015  |
| site | riint      | 0.8    |
| site | rsplig     | 0.3    |
| site | sorpmx     | 2      |
| site | spl_1      | 0.85   |
| site | spl_2      | 0.013  |
| site | strmax_1   | 5000   |
| site | strmax_2   | 5000   |
| site | teff_1     | 15.4   |
| site | teff_2     | 11.75  |
| site | teff_3     | 29.7   |
| site | teff_4     | 0.031  |
| site | tmelt_1    | 0      |
| site | tmelt_2    | 0.002  |
| site | varat1_1_1 | 14     |



|      |             |     |
|------|-------------|-----|
| site | varat1_1_2  | 150 |
| site | varat1_2_1  | 3   |
| site | varat1_2_2  | 30  |
| site | varat1_3_1  | 2   |
| site | varat1_3_2  | 2   |
| site | varat21_1_1 | 22  |
| site | varat21_1_2 | 400 |
| site | varat21_2_1 | 15  |
| site | varat21_2_2 | 100 |
| site | varat21_3_1 | 2   |
| site | varat21_3_2 | 2   |
| site | varat22_1_1 | 20  |
| site | varat22_1_2 | 400 |
| site | varat22_2_1 | 12  |
| site | varat22_2_2 | 100 |
| site | varat22_3_1 | 2   |
| site | varat22_3_2 | 2   |
| site | varat3_1_1  | 8   |
| site | varat3_1_2  | 200 |
| site | varat3_2_1  | 6   |
| site | varat3_2_2  | 50  |
| site | varat3_3_1  | 2   |
| site | varat3_3_2  | 2   |
| site | vlossg      | 1   |

## References

- [1] Ahlborn J, von Wehrden H, Lang B, Römermann C, Oyunbileg M, Oyuntsetseg B, et al. Climate–grazing interactions in Mongolian rangelands: Effects of grazing change along a large-scale environmental gradient. *J Arid Environ* 2020;173:104043.
- [1] Gao W, Angerer JP, Fernandez-Gimenez ME, Reid RS. Is overgrazing a pervasive problem across Mongolia? An examination of livestock forage demand and forage availability from 2000 to 2014. *Proc. Build. Resil. Mong. Rangel. Trans-Discip. Res. Conf. Nutag Action Res. Inst. Ulaanbaatar*, 2015, p. 35–41.
- [2] Zhou HM, Allain D, Li JQ, Zhang WG, Yu XC. Effects of non-genetic factors on production traits of Inner Mongolia cashmere goats in China. *Small Rumin Res* 2003;47:85–9. [https://doi.org/10.1016/S0921-4488\(02\)00246-8](https://doi.org/10.1016/S0921-4488(02)00246-8).
- [3] Holland EA, Detling JK. Plant Response to Herbivory and Belowground Nitrogen Cycling. *Ecology* 1990;71:1040–9. <https://doi.org/10.2307/1937372>.
- [4] Parton WJ, Scurlock JMO, Ojima DS, Gilmanov TG, Scholes RJ, Schimel DS, et al. Observations and modeling of biomass and soil organic matter dynamics for the grassland biome worldwide. *Glob Biogeochem Cycles* 1993;7:785–809. <https://doi.org/10.1029/93GB02042>.
