# Supplementary material
Source: MDPI journal article supplement (https://www.mdpi.com/2073-445X/10/4/397)
Supplement: s1 [file s1]

Archive with 2 entries (2 files):
- Supplement1_Model_inputs.pdf
- Supplement2_Documentation_RPM_0.2.0.pdf
